# Supplementary material for: Machine learning models based on immunological genes to predict the response to neoadjuvant therapy in breast cancer patients
Source: PubMed Central journal article supplement (PMC9352856; doi:10.3389/fimmu.2022.948601), 2022-07-22
Supplement: Image_3.pdf [file Image_3.pdf]

**(A)**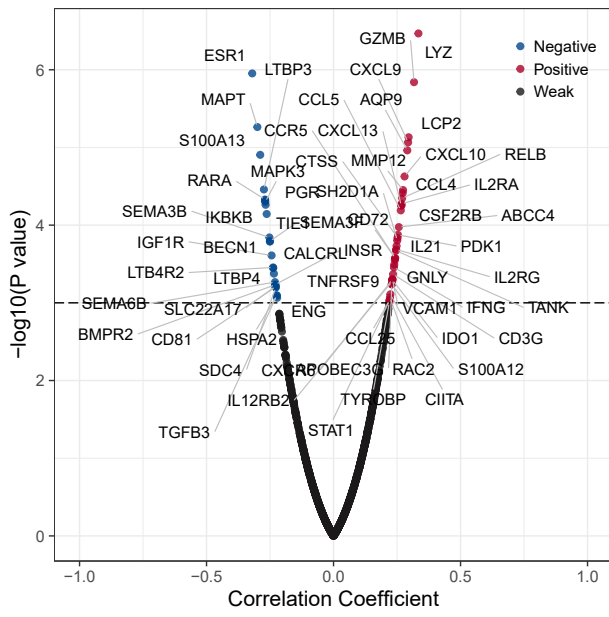**(B)**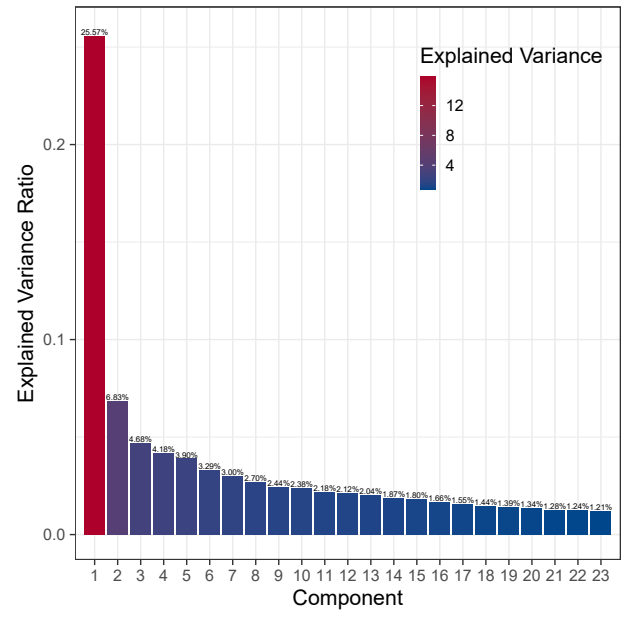

**Supplementary Figure 3. Feature engineering. (A) Feature selection using Spearman rank correlation test. (B) Dimensionality reduction via PCA.**
