# Supplementary material for: Machine learning models based on immunological genes to predict the response to neoadjuvant therapy in breast cancer patients
Source: PubMed Central journal article supplement (PMC9352856; doi:10.3389/fimmu.2022.948601), 2022-07-22
Supplement: Image_8.pdf [file Image_8.pdf]

## Response Predictor for Neoadjuvant Therapy in BC Patients (Ipredictor & ICpredictor)

Estrogen receptor

Negative

Positive

Unknown

Progesterone receptor

Negative

Positive

Unknown

HER2 status

Negative

Positive

Unknown

Upload Immunological Gene Expression File

Browse... example.csv

Upload complete

Please refer to the example file below for the immune gene list and the format

example.csv

Predict Quit

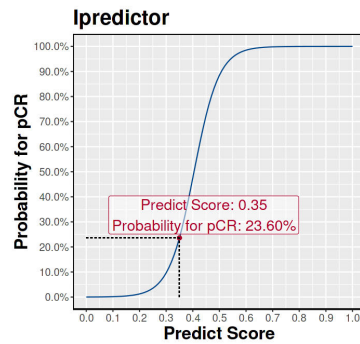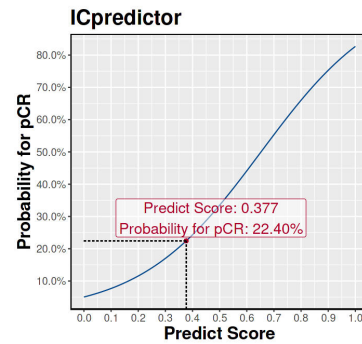

**Please Note:** currently, these models are **only used for** the exhibition of research results. They **should not** be used in clinical practice until they are validated in large prospective studies!

**Supplementary Figure 8.** A web-based application demonstration for the Ipredictor and ICpredictor models (available at <https://www.jchen-lab.work:8082/imbc/>). When ER status, PR status, HER2 status, and immunological gene expression file were inputted (left panel), it can calculate the predict scores and predict the pCR probabilities for the Ipredictor and ICpredictor models (right panel).
