# Supplementary material for: Machine learning models based on immunological genes to predict the response to neoadjuvant therapy in breast cancer patients
Source: PubMed Central journal article supplement (PMC9352856; doi:10.3389/fimmu.2022.948601), 2022-07-22
Supplement: Image_9.pdf [file Image_9.pdf]

(A)

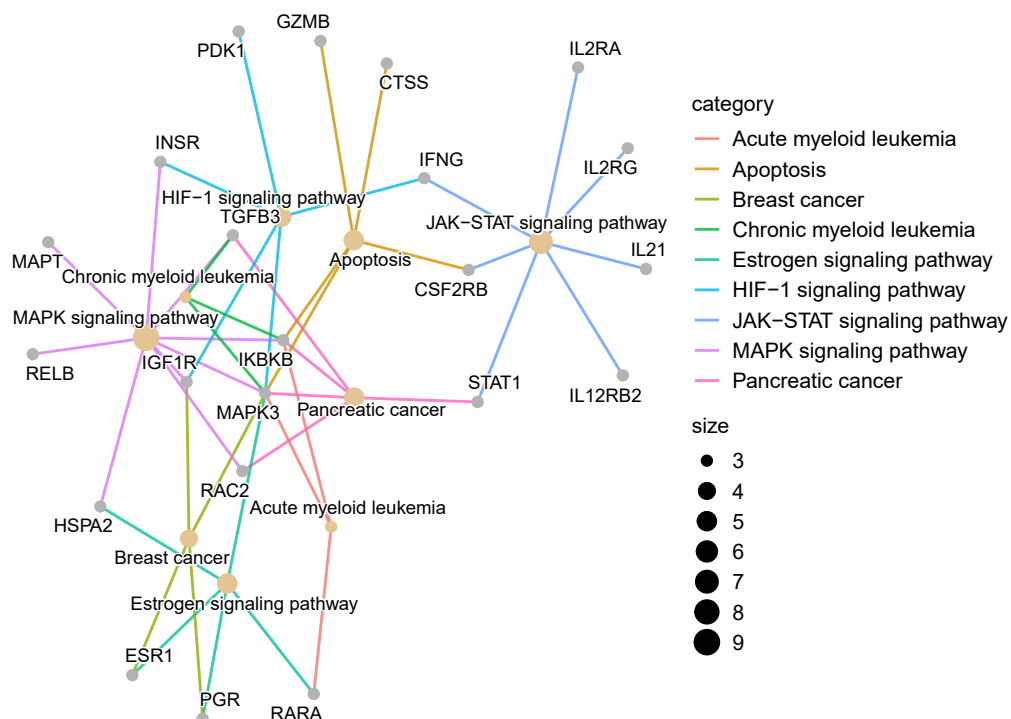

(B)

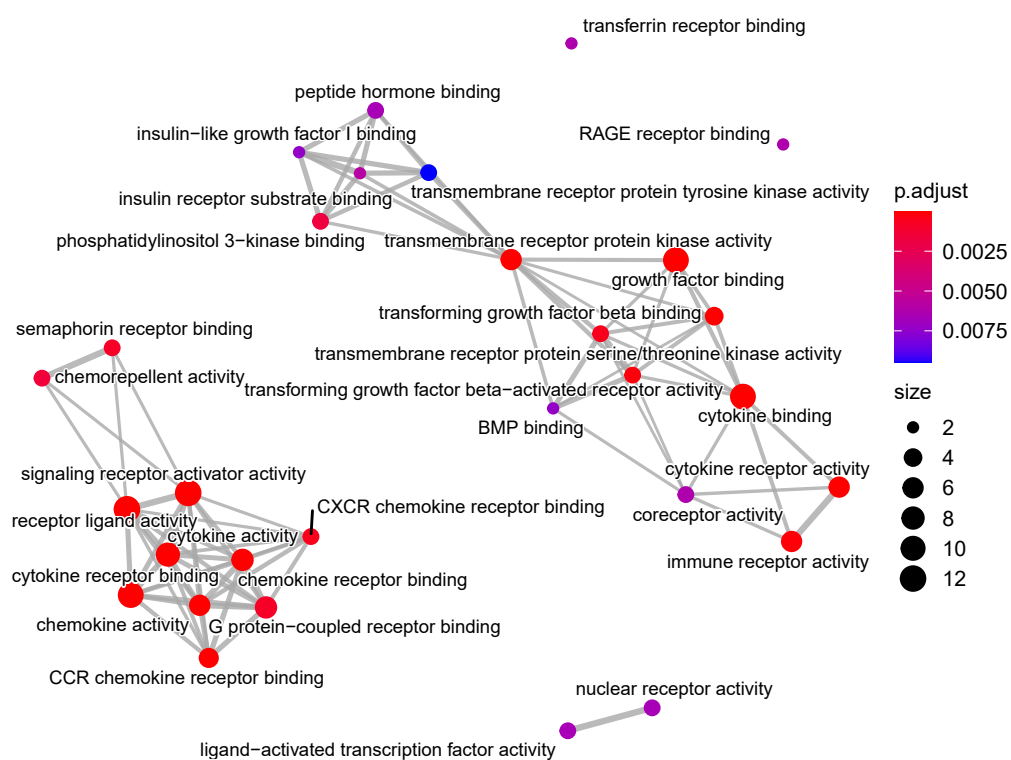

**Supplementary Figure 9.** KEGG pathway (A) and GO molecular function (B) over-representation analyses on the 62 pCR-related immunological genes.
