# Supplementary material for: Machine learning models based on immunological genes to predict the response to neoadjuvant therapy in breast cancer patients
Source: PubMed Central journal article supplement (PMC9352856; doi:10.3389/fimmu.2022.948601), 2022-07-22
Supplement: Image_11.pdf [file Image_11.pdf]

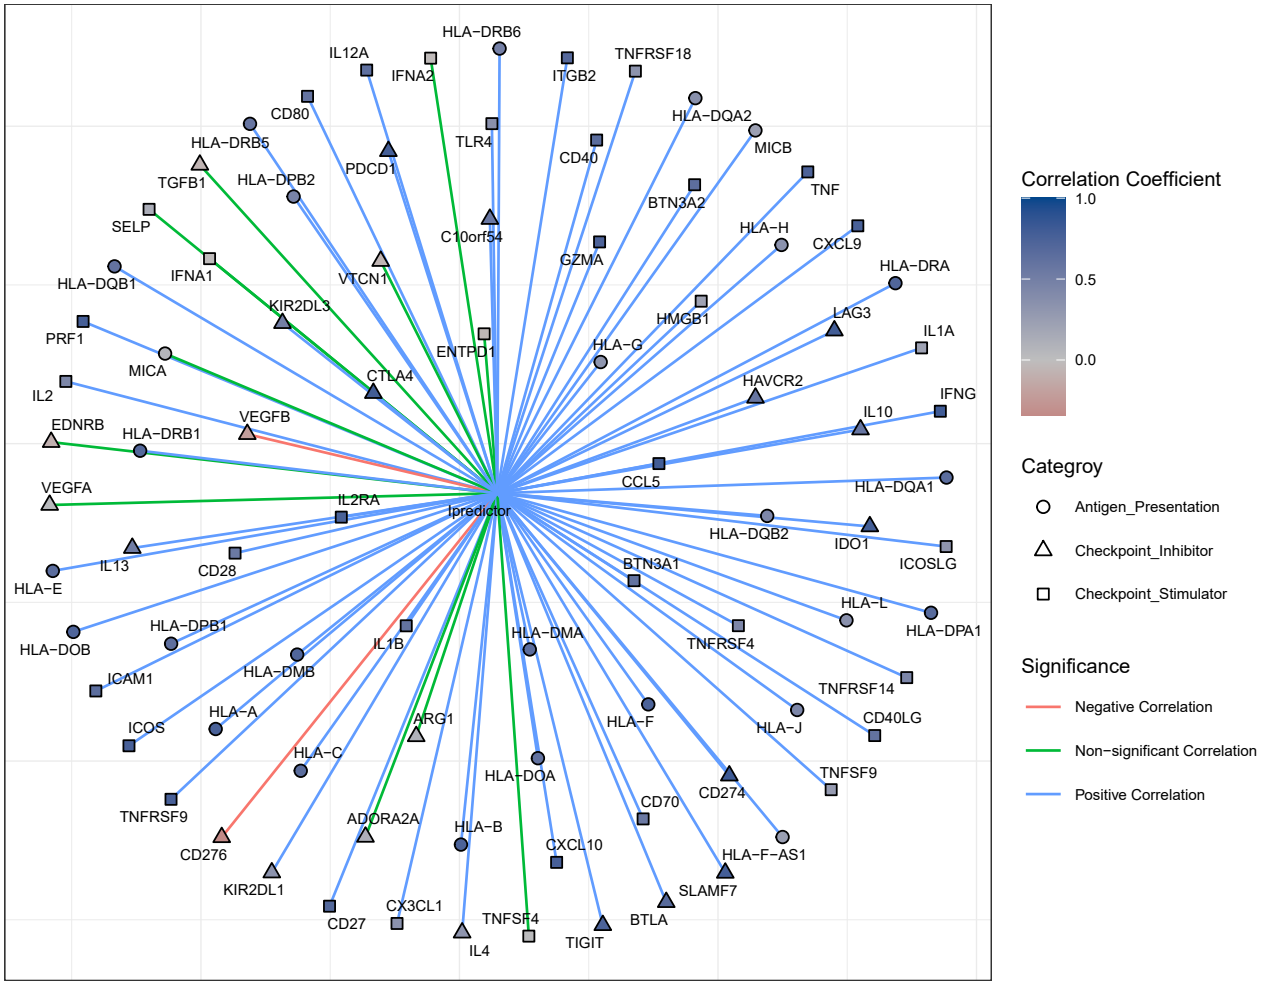

**Supplementary Figure 11.** Association between the PS and expression of antigen presentation genes and immune checkpoint genes.
