# Supplementary material for: Machine learning models based on immunological genes to predict the response to neoadjuvant therapy in breast cancer patients
Source: PubMed Central journal article supplement (PMC9352856; doi:10.3389/fimmu.2022.948601), 2022-07-22
Supplement: Image_12.pdf [file Image_12.pdf]

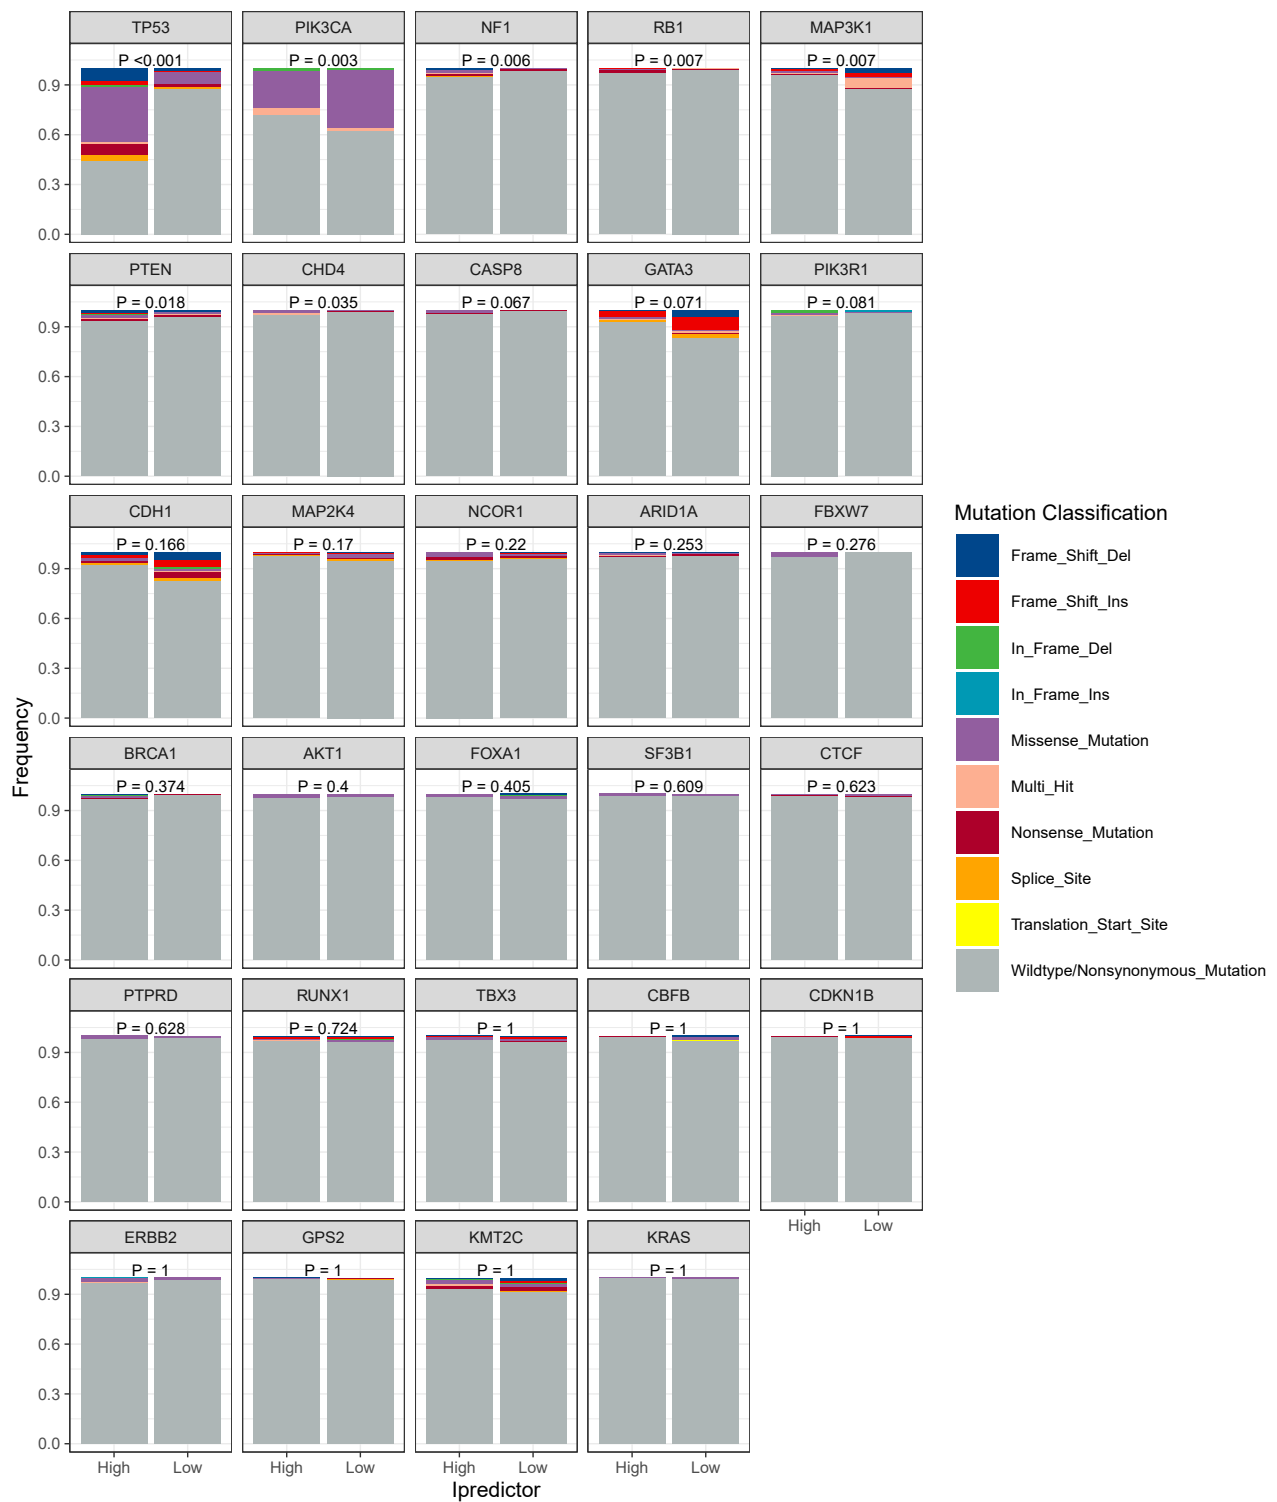

**Supplementary Figure 12.** Comparisons of BC driver gene mutation frequencies between patients with high and low PSs.
